# Supplementary material for: A Complete Survey of Glycoalkaloids Using LC-FTICR-MS and IRMPD in a Commercial Variety and a Local Landrace of Eggplant (Solanum melongena L.) and their Anticholinesterase and Antioxidant Activities
Source: PubMed Central journal article supplement (PMC6521288; doi:10.3390/toxins11040230), 2019-04-19
Supplement: toxins-11-00230-s001.pdf [file toxins-11-00230-s001.pdf]

# Supplementary Materials: A complete survey of glycoalkaloids using LC-FTICR-MS and IRMPD in a commercial variety and a local landrace of eggplant (*Solanum melongena* L.) and their anticholinesterase and antioxidant activities

Filomena Lelario, Susanna De Maria, Anna Rita Rivelli, Daniela Russo, Luigi Milella, Sabino Aurelio Bufo and Laura Scranò

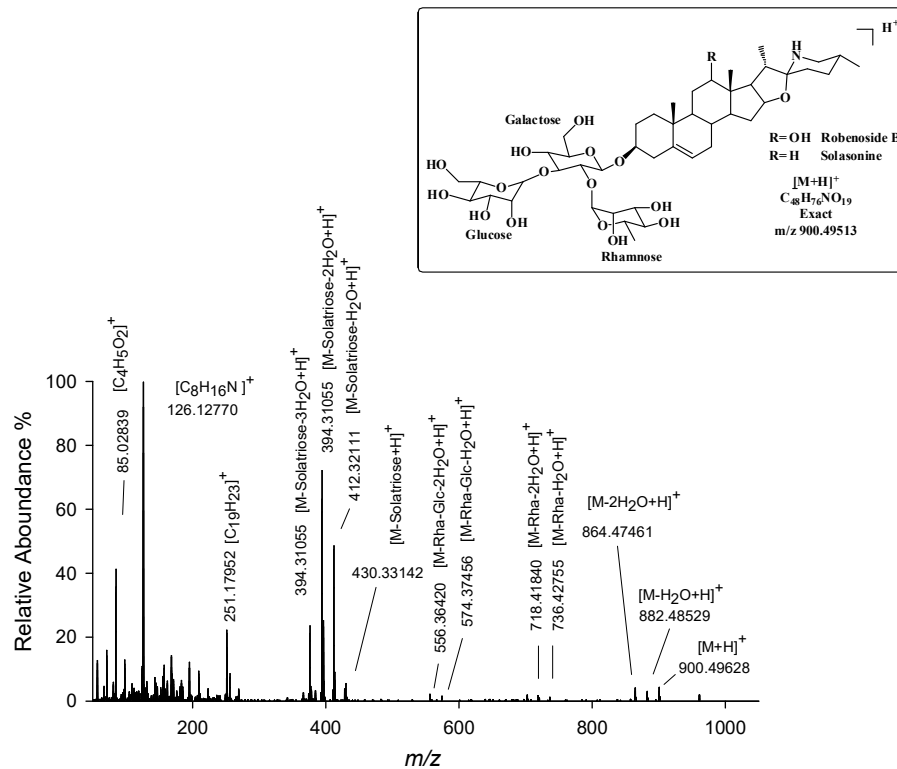

**Figure S1.** High-resolution IRMPD FTICR mass spectrum of the protonated Robenoside B at  $m/z$  900. Following transfer to the ICR cell, precursor ion populations were photon-irradiated for 290 ms at 100% laser power.

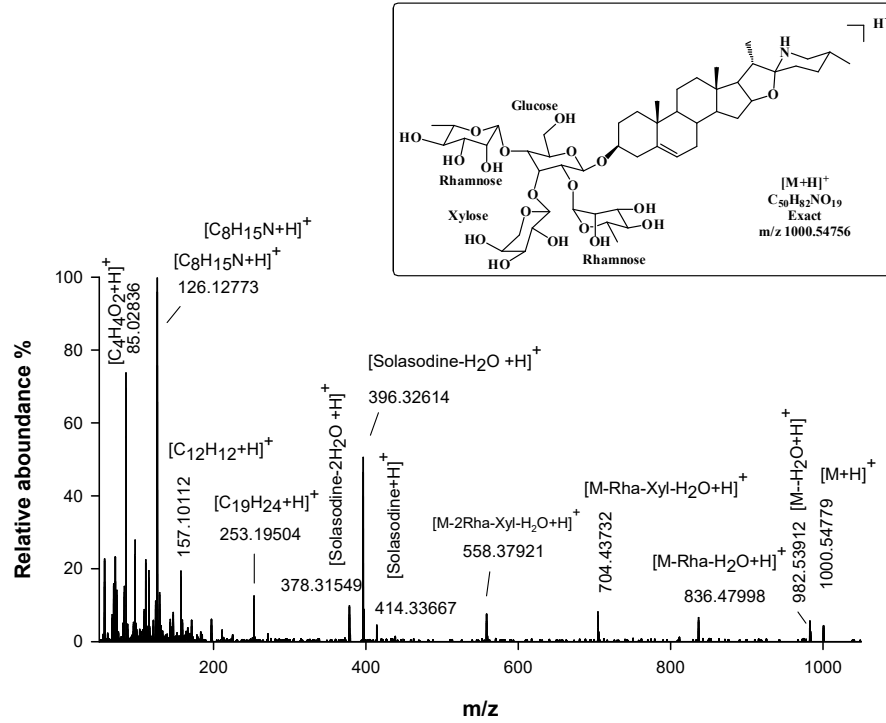

**Figure S2.** High-resolution IRMPD FTICR mass spectrum of the protonated arudonine at  $m/z$  1000. Following transfer to the ICR cell, precursor ion populations were photon-irradiated for 290 ms at 100% laser power.

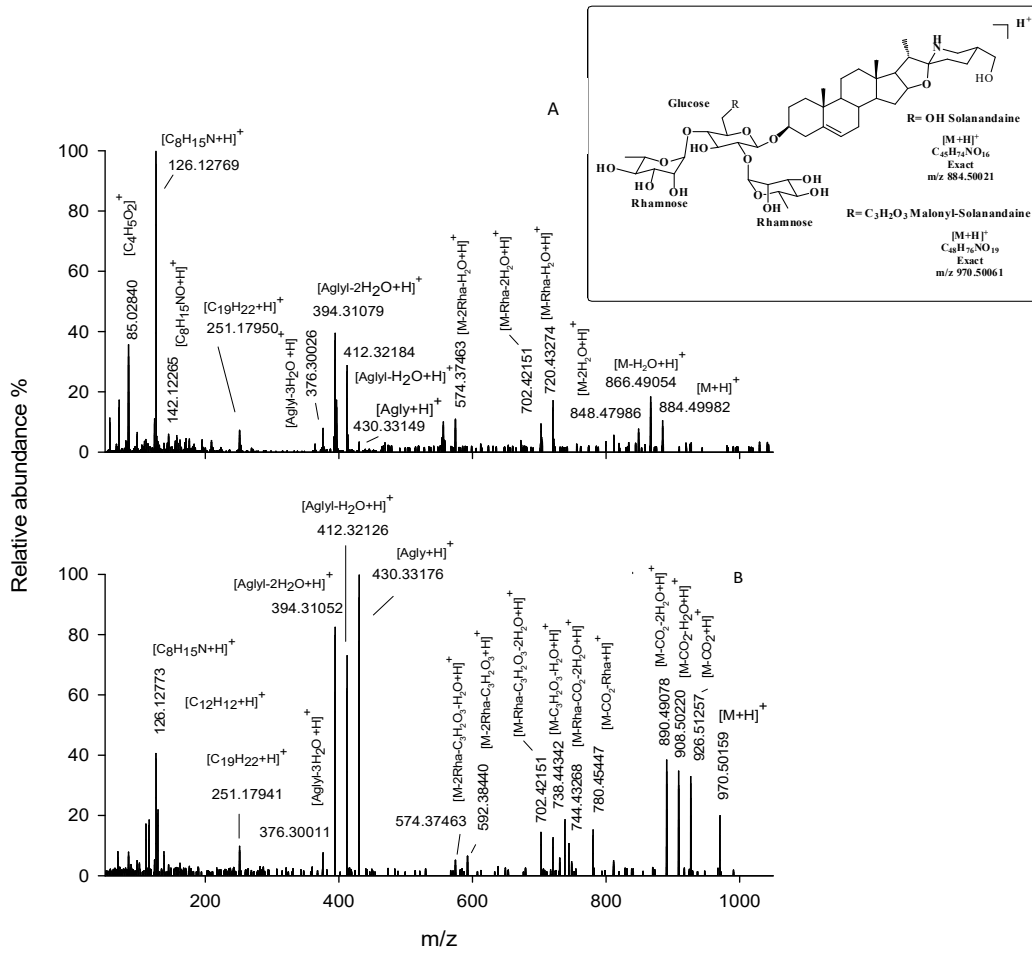

**Figure S3.** High-resolution IRMPD FTICR mass spectra of the protonated solanandaine (A) at  $m/z$  884 and malonyl-solanandaine (B) at  $m/z$  970. Following transfer to the ICR cell, precursor ion populations were photon-irradiated for 290 ms at 100% laser power.

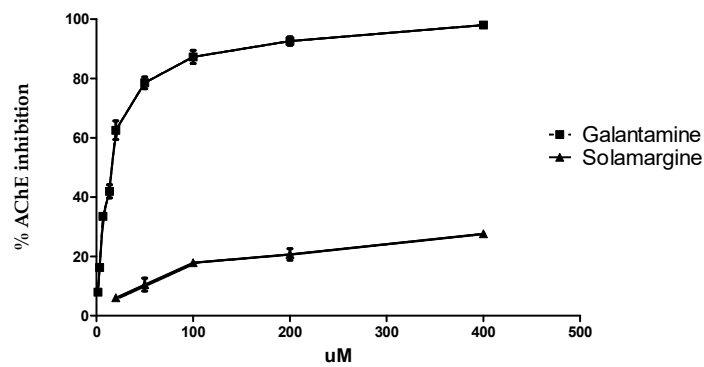

**Figure S4.** Inhibition of Acetylcholinesterase (AChE) enzyme by Galantamine and Solamargine.

**Table S1.** IRMPD FTICR MS product ions obtained from glycoalkaloids and malonyl glycoalkaloid and identified in *S. melongena* pulp by high resolution LC-ESI-IRMPD-FTICR MS.

| Compound | Chemical formula as protonated molecule, [M+H] <sup>+</sup>      | Precursor Ion Accurate m/z | Main IRMPD MS/MS product ions (accurate m/z) <sup>a</sup> and mass error (ppm) <sup>b</sup>                                                                                                                                                                                                                                                                                                                                                                                                                                                                                                                                                                                                                                                                                                                                                                                                                                                                                                                                               |
|----------|------------------------------------------------------------------|----------------------------|-------------------------------------------------------------------------------------------------------------------------------------------------------------------------------------------------------------------------------------------------------------------------------------------------------------------------------------------------------------------------------------------------------------------------------------------------------------------------------------------------------------------------------------------------------------------------------------------------------------------------------------------------------------------------------------------------------------------------------------------------------------------------------------------------------------------------------------------------------------------------------------------------------------------------------------------------------------------------------------------------------------------------------------------|
| 1)       | [C <sub>45</sub> H <sub>72</sub> NO <sub>16</sub> ] <sup>+</sup> | 882.48419                  | 864.47543 (C <sub>45</sub> H <sub>70</sub> NO <sub>15</sub> <sup>+</sup> , 1.6), 718.41730 (C <sub>39</sub> H <sub>60</sub> NO <sub>11</sub> <sup>+</sup> , 0.7), 572.35901 (C <sub>33</sub> H <sub>50</sub> NO <sub>7</sub> <sup>+</sup> , 1.5), 428.31628 (C <sub>27</sub> H <sub>42</sub> NO <sub>3</sub> <sup>+</sup> , 0.8), 410.30557 (C <sub>27</sub> H <sub>40</sub> NO <sub>2</sub> <sup>+</sup> , 0.5), 392.29504 (C <sub>27</sub> H <sub>38</sub> NO <sup>+</sup> , 0.6), 374.28439 (C <sub>27</sub> H <sub>36</sub> N <sup>+</sup> , 0.4), 267.17441 (C <sub>19</sub> H <sub>23</sub> O <sup>+</sup> , 0.2), 126.12770 (C <sub>8</sub> H <sub>16</sub> N <sup>+</sup> , -0.2)                                                                                                                                                                                                                                                                                                                                                 |
| 2)       | [C <sub>45</sub> H <sub>72</sub> NO <sub>15</sub> ] <sup>+</sup> | 866.49005                  | 720.43188 (C <sub>39</sub> H <sub>62</sub> NO <sub>11</sub> <sup>+</sup> , 0.2), 574.37402 (C <sub>33</sub> H <sub>52</sub> NO <sub>7</sub> <sup>+</sup> , 0.3), 412.31111 (C <sub>27</sub> H <sub>42</sub> NO <sub>2</sub> <sup>+</sup> , 0.2), 394.31052 (C <sub>27</sub> H <sub>40</sub> NO <sup>+</sup> , 0.1), 182.15393 (C <sub>11</sub> H <sub>20</sub> NO <sup>+</sup> , -0.05), 157.10114 (C <sub>12</sub> H <sub>13</sub> <sup>+</sup> , -0.3), 85.02840 (C <sub>4</sub> H <sub>5</sub> O <sub>2</sub> <sup>+</sup> , -0.1)                                                                                                                                                                                                                                                                                                                                                                                                                                                                                                     |
| 3)       | [C <sub>45</sub> H <sub>72</sub> NO <sub>15</sub> ] <sup>+</sup> | 866.48950                  | 848.48059 (C <sub>45</sub> H <sub>70</sub> NO <sub>14</sub> <sup>+</sup> , 1.5), 720.43060 (C <sub>39</sub> H <sub>62</sub> NO <sub>11</sub> <sup>+</sup> , -1.6), 702.42242 (C <sub>39</sub> H <sub>60</sub> NO <sub>10</sub> <sup>+</sup> , -1.4), 574.37469 (C <sub>33</sub> H <sub>52</sub> NO <sub>7</sub> <sup>+</sup> , 1.1), 558.37952 (C <sub>33</sub> H <sub>50</sub> NO <sub>6</sub> <sup>+</sup> , 1.1), 556.36407 (C <sub>33</sub> H <sub>50</sub> NO <sub>6</sub> <sup>+</sup> , 1.4), 412.32129 (C <sub>27</sub> H <sub>42</sub> NO <sub>2</sub> <sup>+</sup> , 0.7), 396.32632 (C <sub>27</sub> H <sub>42</sub> NO <sup>+</sup> , 0.6), 394.31067 (C <sub>27</sub> H <sub>40</sub> NO <sup>+</sup> , 0.6), 376.30002 (C <sub>27</sub> H <sub>38</sub> N <sup>+</sup> , -1.0)                                                                                                                                                                                                                                              |
| 4)       | [C <sub>45</sub> H <sub>74</sub> NO <sub>16</sub> ] <sup>+</sup> | 884.50055                  | 866.49023 (C <sub>45</sub> H <sub>72</sub> NO <sub>15</sub> <sup>+</sup> , 0.6), 412.32104 (C <sub>27</sub> H <sub>42</sub> NO <sub>2</sub> <sup>+</sup> , 0.08), 394.31076 (C <sub>27</sub> H <sub>40</sub> NO <sup>+</sup> , 0.6), 271.20560 (C <sub>19</sub> H <sub>27</sub> O <sup>+</sup> , -0.2), 253.19504 (C <sub>19</sub> H <sub>25</sub> <sup>+</sup> , -0.15), 157.10112 (C <sub>12</sub> H <sub>13</sub> <sup>+</sup> , -0.4), 85.02837 (C <sub>4</sub> H <sub>5</sub> O <sub>2</sub> <sup>+</sup> , -0.4)                                                                                                                                                                                                                                                                                                                                                                                                                                                                                                                    |
| 5)       | [C <sub>45</sub> H <sub>74</sub> NO <sub>16</sub> ] <sup>+</sup> | 884.49982                  | 866.50575 (C <sub>45</sub> H <sub>72</sub> NO <sub>15</sub> <sup>+</sup> , 1.0), 720.43368 (C <sub>39</sub> H <sub>62</sub> NO <sub>11</sub> <sup>+</sup> , 2.7), 430.33249 (C <sub>27</sub> H <sub>44</sub> NO <sub>3</sub> <sup>+</sup> , 2.1), 412.32184 (2.0), 394.311116 (C <sub>27</sub> H <sub>40</sub> NO <sup>+</sup> , 1.8), 376.00063 (C <sub>27</sub> H <sub>38</sub> N <sup>+</sup> , 1.9), 364.26401 (C <sub>25</sub> H <sub>34</sub> NO <sup>+</sup> , 1.4), 251.17964 (C <sub>19</sub> H <sub>23</sub> <sup>+</sup> , 0.8), 126.12769 (C <sub>8</sub> H <sub>16</sub> N <sup>+</sup> , -0.3)                                                                                                                                                                                                                                                                                                                                                                                                                              |
| 6)       | [C <sub>45</sub> H <sub>74</sub> NO <sub>16</sub> ] <sup>+</sup> | 884.50000                  | 866.50500 (C <sub>45</sub> H <sub>72</sub> NO <sub>15</sub> <sup>+</sup> , 0.1), 720.43324 (C <sub>39</sub> H <sub>62</sub> NO <sub>11</sub> , 2.1), 558.37856 (C <sub>33</sub> H <sub>52</sub> NO <sub>6</sub> , -0.6), 414.33592 (C <sub>27</sub> H <sub>44</sub> NO <sub>2</sub> , -1.7), 396.32658 (C <sub>27</sub> H <sub>42</sub> NO, 1.2), 253.19576 (C <sub>19</sub> H <sub>25</sub> , 2.7), 157.10123 (C <sub>12</sub> H <sub>13</sub> , 0.3), 126.12772 (C <sub>8</sub> H <sub>16</sub> N, 1.4), 85.02845 (C <sub>4</sub> H <sub>5</sub> O <sub>2</sub> , 0.5)                                                                                                                                                                                                                                                                                                                                                                                                                                                                  |
| 7)       | [C <sub>45</sub> H <sub>74</sub> NO <sub>17</sub> ] <sup>+</sup> | 900.49607                  | 882.48529 (C <sub>45</sub> H <sub>72</sub> NO <sub>16</sub> , 0.8), 864.47461 (C <sub>45</sub> H <sub>70</sub> NO <sub>15</sub> , 0.7), 736.42755(), 718.41640 (C <sub>39</sub> H <sub>60</sub> NO <sub>11</sub> , 0.4), 574.37456 (C <sub>33</sub> H <sub>52</sub> NO <sub>6</sub> , 1.3), 556.36420 (C <sub>33</sub> H <sub>50</sub> NO <sub>5</sub> , 1.7), 430.33142 (C <sub>27</sub> H <sub>44</sub> NO <sub>3</sub> , -0.8), 412.32111 (C <sub>27</sub> H <sub>42</sub> NO <sub>2</sub> , 0.2), 394.31055 (C <sub>27</sub> H <sub>40</sub> NO, 0.3), 376.26370 (C <sub>26</sub> H <sub>34</sub> NO, 0.6), 251.17952 (C <sub>19</sub> H <sub>23</sub> , 0.4), 126.12770 (C <sub>8</sub> H <sub>16</sub> N, 0.04), 85.02839 (C <sub>4</sub> H <sub>5</sub> O <sub>2</sub> , -0.02)                                                                                                                                                                                                                                                    |
| 8)       | [C <sub>48</sub> H <sub>74</sub> NO <sub>18</sub> ] <sup>+</sup> | 952.48956                  | 908.50000 (C <sub>47</sub> H <sub>74</sub> NO <sub>16</sub> , -0.2), 890.48959 (C <sub>47</sub> H <sub>72</sub> NO <sub>15</sub> , -0.2), 762.44232 (C <sub>41</sub> H <sub>46</sub> NO <sub>12</sub> , 0.02), 720.43188 (C <sub>39</sub> H <sub>62</sub> NO <sub>11</sub> , 0.2), 574.37378 (C <sub>33</sub> H <sub>52</sub> NO <sub>7</sub> , -0.08), 412.32077 (C <sub>27</sub> H <sub>42</sub> NO <sub>2</sub> , -0.5), 394.31030 (C <sub>27</sub> H <sub>40</sub> NO, -0.4), 162.12762 (C <sub>11</sub> H <sub>16</sub> N, -0.6), 85.02835 (C <sub>4</sub> H <sub>5</sub> O <sub>2</sub> , -0.6)                                                                                                                                                                                                                                                                                                                                                                                                                                     |
| 9)       | [C <sub>45</sub> H <sub>74</sub> NO <sub>15</sub> ] <sup>+</sup> | 868.50641                  | 850.49524 (C <sub>45</sub> H <sub>72</sub> NO <sub>14</sub> <sup>+</sup> , 0.6), 704.44912 (C <sub>39</sub> H <sub>62</sub> NO <sub>10</sub> <sup>+</sup> , 1.6), 414.33682 (C <sub>27</sub> H <sub>44</sub> NO <sub>2</sub> <sup>+</sup> , 0.4), 396.32608 (C <sub>27</sub> H <sub>42</sub> NO <sup>+</sup> , -0.02), 378.31564 (C <sub>27</sub> H <sub>40</sub> N <sup>+</sup> , 0.3), 253.19507 (C <sub>19</sub> H <sub>25</sub> <sup>+</sup> , 0.03)                                                                                                                                                                                                                                                                                                                                                                                                                                                                                                                                                                                  |
| 10)      | [C <sub>45</sub> H <sub>74</sub> NO <sub>15</sub> ] <sup>+</sup> | 868.50573                  | 850.50995 (C <sub>45</sub> H <sub>72</sub> NO <sub>14</sub> <sup>+</sup> , 1.6), 704.44910 (C <sub>39</sub> H <sub>62</sub> NO <sub>10</sub> <sup>+</sup> , 1.6), 558.37844 (C <sub>33</sub> H <sub>52</sub> NO <sub>6</sub> <sup>+</sup> , -0.8), 414.33688 (C <sub>27</sub> H <sub>44</sub> NO <sub>2</sub> <sup>+</sup> , 0.5), 396.32617 (C <sub>27</sub> H <sub>42</sub> NO <sup>+</sup> , 0.2), 378.31558 (C <sub>27</sub> H <sub>40</sub> N <sup>+</sup> , 0.1), 271.2056 (C <sub>19</sub> H <sub>27</sub> O <sup>+</sup> , 0.2), 253.19508 (C <sub>19</sub> H <sub>25</sub> <sup>+</sup> , 0.02), 197.13243 (C <sub>15</sub> H <sub>17</sub> <sup>+</sup> , -0.2), 157.10110 (C <sub>12</sub> H <sub>13</sub> <sup>+</sup> , -0.5), 147.06511 (C <sub>6</sub> H <sub>11</sub> O <sub>4</sub> <sup>+</sup> , -0.5), 143.08546 (C <sub>11</sub> H <sub>11</sub> <sup>+</sup> , -0.5), 126.12766 (C <sub>8</sub> H <sub>16</sub> N <sup>+</sup> , -0.6), 85.02835 (C <sub>4</sub> H <sub>5</sub> O <sub>2</sub> <sup>+</sup> , -0.6) |
| 11)      | [C <sub>45</sub> H <sub>68</sub> NO <sub>15</sub> ] <sup>+</sup> | 862.45864                  | 716.39897 (C <sub>39</sub> H <sub>58</sub> NO <sub>11</sub> <sup>+</sup> , -2.0), 570.34136 (C <sub>33</sub> H <sub>48</sub> NO <sub>7</sub> <sup>+</sup> , -2.0), 408.28930 (C <sub>27</sub> H <sub>38</sub> NO <sub>2</sub> <sup>+</sup> , -1.0), 390.27904 (C <sub>27</sub> H <sub>36</sub> NO <sup>+</sup> , -0.3), 376.26392 (C <sub>26</sub> H <sub>34</sub> NO <sup>+</sup> , 1.1)                                                                                                                                                                                                                                                                                                                                                                                                                                                                                                                                                                                                                                                 |

|     |                                                                  |            |                                                                                                                                                                                                                                                                                                                                                                                                                                                                                                                                                                                                                                                                                                                                                                                                                                                                                                                                                   |
|-----|------------------------------------------------------------------|------------|---------------------------------------------------------------------------------------------------------------------------------------------------------------------------------------------------------------------------------------------------------------------------------------------------------------------------------------------------------------------------------------------------------------------------------------------------------------------------------------------------------------------------------------------------------------------------------------------------------------------------------------------------------------------------------------------------------------------------------------------------------------------------------------------------------------------------------------------------------------------------------------------------------------------------------------------------|
| 12) | [C <sub>48</sub> H <sub>76</sub> NO <sub>19</sub> ] <sup>+</sup> | 970.50130  | 926.51257 (C <sub>47</sub> H <sub>76</sub> NO <sub>17</sub> <sup>+</sup> , -0.9), 908.50220 (C <sub>47</sub> H <sub>76</sub> NO <sub>17</sub> <sup>+</sup> , -0.9), 890.49078 (C <sub>47</sub> H <sub>72</sub> NO <sub>15</sub> <sup>+</sup> , 1.3), 780.45247 (C <sub>41</sub> H <sub>66</sub> NO <sub>13</sub> <sup>+</sup> , -0.5), 744.43268 (C <sub>41</sub> H <sub>62</sub> NO <sub>11</sub> <sup>+</sup> , 1.2), 702.42151 (C <sub>39</sub> H <sub>60</sub> NO <sub>10</sub> <sup>+</sup> , 0.4), 430.33179 (C <sub>27</sub> H <sub>44</sub> NO <sub>3</sub> <sup>+</sup> , 0.5), 412.32126 (C <sub>27</sub> H <sub>42</sub> NO <sub>2</sub> <sup>+</sup> , 0.6), 394.31052 (C <sub>27</sub> H <sub>40</sub> NO <sup>+</sup> , 0.2), 376.30011 (C <sub>26</sub> H <sub>34</sub> NO <sup>+</sup> , 0.6), 251.17941 (C <sub>19</sub> H <sub>23</sub> <sup>+</sup> , 0.05), 126.12772 (C <sub>8</sub> H <sub>16</sub> N <sup>+</sup> , -0.02) |
| 13) | [C <sub>48</sub> H <sub>70</sub> NO <sub>18</sub> ] <sup>+</sup> | 948.45788  | 904.46846 (C <sub>47</sub> H <sub>70</sub> NO <sub>16</sub> <sup>+</sup> , -0.5), 862.45704 (C <sub>45</sub> H <sub>68</sub> NO <sub>15</sub> <sup>+</sup> , 1.5), 844.44654 (C <sub>45</sub> H <sub>66</sub> NO <sub>14</sub> <sup>+</sup> , -1.5), 758.44888 (C <sub>41</sub> H <sub>60</sub> NO <sub>12</sub> <sup>+</sup> , 2.0), 716.39987 (C <sub>39</sub> H <sub>58</sub> NO <sub>11</sub> <sup>+</sup> , -0.8), 408.28955 (C <sub>27</sub> H <sub>38</sub> NO <sub>2</sub> <sup>+</sup> , -0.4), 390.27852 (C <sub>27</sub> H <sub>36</sub> NO <sup>+</sup> , 1.8), 376.26380 (C <sub>26</sub> H <sub>34</sub> NO <sup>+</sup> , 0.8)                                                                                                                                                                                                                                                                                                     |
| 14) | [C <sub>50</sub> H <sub>82</sub> NO <sub>19</sub> ] <sup>+</sup> | 1000.54779 | 982.53912 (C <sub>50</sub> H <sub>80</sub> NO <sub>18</sub> <sup>+</sup> , 2.1), 836.47998 (C <sub>44</sub> H <sub>70</sub> NO <sub>14</sub> <sup>+</sup> , 1.0), 704.43732 (C <sub>39</sub> H <sub>62</sub> NO <sub>10</sub> <sup>+</sup> , 0.7), 558.37921 (C <sub>33</sub> H <sub>52</sub> NO <sub>10</sub> <sup>+</sup> , 0.5), 414.33667 (C <sub>27</sub> H <sub>44</sub> NO <sub>2</sub> <sup>+</sup> , 0.03), 396.32614 (C <sub>27</sub> H <sub>42</sub> NO <sup>+</sup> , 0.1), 378.31549 (C <sub>27</sub> H <sub>40</sub> N <sup>+</sup> , -0.1), 253.19504 (C <sub>19</sub> H <sub>25</sub> <sup>+</sup> , -0.1), 157.10112 (C <sub>12</sub> H <sub>13</sub> <sup>+</sup> , -0.3), 126.12766 (C <sub>8</sub> H <sub>16</sub> N <sup>+</sup> , -0.5)                                                                                                                                                                                     |
| 15) | [C <sub>48</sub> H <sub>76</sub> NO <sub>18</sub> ] <sup>+</sup> | 954.50584  | 910.51624 (C <sub>47</sub> H <sub>76</sub> NO <sub>16</sub> <sup>+</sup> , 0.4), 892.50586 (C <sub>47</sub> H <sub>74</sub> NO <sub>15</sub> <sup>+</sup> , 0.4), 764.45892 (C <sub>41</sub> H <sub>66</sub> NO <sub>12</sub> <sup>+</sup> , 0.1), 746.44781 (C <sub>41</sub> H <sub>64</sub> NO <sub>11</sub> <sup>+</sup> , 0.6), 722.44781 (C <sub>39</sub> H <sub>64</sub> NO <sub>11</sub> <sup>+</sup> , 0.6), 576.38971 (C <sub>33</sub> H <sub>54</sub> NO <sub>7</sub> <sup>+</sup> , 0.4), 558.37909 (C <sub>33</sub> H <sub>52</sub> NO <sub>6</sub> <sup>+</sup> , 0.3), 414.33670 (C <sub>27</sub> H <sub>44</sub> NO <sub>2</sub> <sup>+</sup> , 0.1), 396.32611 (C <sub>27</sub> H <sub>42</sub> NO <sup>+</sup> , 0.04), 378.31555 (C <sub>27</sub> H <sub>40</sub> NO <sup>+</sup> , 0.06), 271.20587 (C <sub>19</sub> H <sub>27</sub> O <sup>+</sup> , 0.8)                                                                     |
| 16) | [C <sub>48</sub> H <sub>76</sub> NO <sub>18</sub> ] <sup>+</sup> | 954.50525  | 910.51751 (C <sub>47</sub> H <sub>76</sub> NO <sub>16</sub> <sup>+</sup> , 1.8), 892.50543 (C <sub>47</sub> H <sub>74</sub> NO <sub>15</sub> <sup>+</sup> , 0.1), 764.45806 (0.1), 746.44784 (C <sub>41</sub> H <sub>66</sub> NO <sub>12</sub> <sup>+</sup> , 0.6), 722.44865 (C <sub>39</sub> H <sub>64</sub> NO <sub>11</sub> <sup>+</sup> , 1.7), 576.38941 (C <sub>33</sub> H <sub>54</sub> NO <sub>7</sub> <sup>+</sup> , -0.1), 558.37898 (C <sub>33</sub> H <sub>52</sub> NO <sub>6</sub> <sup>+</sup> , 0.1), 414.33672 (C <sub>27</sub> H <sub>44</sub> NO <sub>2</sub> <sup>+</sup> , 0.1), 396.32690 (C <sub>27</sub> H <sub>42</sub> NO <sup>+</sup> , 2.0), 378.31576 (C <sub>27</sub> H <sub>40</sub> NO <sup>+</sup> , 0.6), 253.19502 (C <sub>19</sub> H <sub>27</sub> <sup>+</sup> , -0.2)                                                                                                                                       |
| 17) | [C <sub>45</sub> H <sub>74</sub> NO <sub>16</sub> ] <sup>+</sup> | 884.49939  | 866.48907 (C <sub>45</sub> H <sub>72</sub> NO <sub>15</sub> <sup>+</sup> , -0.7), 848.47858 (C <sub>45</sub> H <sub>70</sub> NO <sub>14</sub> <sup>+</sup> , -0.6), 720.43134 (C <sub>39</sub> H <sub>62</sub> NO <sub>11</sub> <sup>+</sup> , -0.6), 574.37366 (C <sub>33</sub> H <sub>52</sub> NO <sub>7</sub> <sup>+</sup> , -0.3), 430.33118 (C <sub>27</sub> H <sub>44</sub> NO <sub>3</sub> <sup>+</sup> , -0.9), 412.32077 (C <sub>27</sub> H <sub>42</sub> NO <sub>2</sub> <sup>+</sup> , -0.6), 394.31021 (C <sub>27</sub> H <sub>40</sub> NO <sup>+</sup> , -0.6), 376.29959 (C <sub>27</sub> H <sub>38</sub> N <sup>+</sup> , -0.7), 251.17924 (C <sub>19</sub> H <sub>23</sub> <sup>+</sup> , -0.7), 168.13818 (C <sub>10</sub> H <sub>18</sub> NO <sup>+</sup> , -0.6), 126.12765 (C <sub>8</sub> H <sub>16</sub> N <sup>+</sup> , -0.6)                                                                                             |
| 18) | [C <sub>45</sub> H <sub>74</sub> NO <sub>16</sub> ] <sup>+</sup> | 884.49994  | 866.48914 (C <sub>45</sub> H <sub>72</sub> NO <sub>15</sub> <sup>+</sup> , -0.6), 720.43140 (C <sub>39</sub> H <sub>62</sub> NO <sub>11</sub> <sup>+</sup> , -0.5), 430.33173 (C <sub>27</sub> H <sub>44</sub> NO <sub>3</sub> <sup>+</sup> , 0.4), 412.32098 (C <sub>27</sub> H <sub>42</sub> NO <sub>2</sub> <sup>+</sup> , -0.05), 394.31042 (C <sub>27</sub> H <sub>40</sub> NO <sup>+</sup> , -0.04), 376.29977 (C <sub>27</sub> H <sub>38</sub> N <sup>+</sup> , -0.3), 251.17937 (C <sub>19</sub> H <sub>23</sub> <sup>+</sup> , -0.2), 162.12770 (C <sub>11</sub> H <sub>16</sub> N <sup>+</sup> , -0.2), 126.12771 (C <sub>8</sub> H <sub>16</sub> N <sup>+</sup> , -0.1)                                                                                                                                                                                                                                                                |
| 19) | [C <sub>45</sub> H <sub>74</sub> NO <sub>17</sub> ] <sup>+</sup> | 900.49628  | 882.48529 (C <sub>45</sub> H <sub>72</sub> NO <sub>16</sub> <sup>+</sup> , 0.8), 864.47461 (C <sub>45</sub> H <sub>70</sub> NO <sub>15</sub> <sup>+</sup> , 0.7), 718.41699 (C <sub>39</sub> H <sub>60</sub> NO <sub>11</sub> <sup>+</sup> , 1.2), 430.33124 (C <sub>27</sub> H <sub>44</sub> NO <sub>3</sub> <sup>+</sup> , -0.8), 412.32111 (C <sub>27</sub> H <sub>42</sub> NO <sub>2</sub> <sup>+</sup> , 0.2), 394.31055 (C <sub>27</sub> H <sub>40</sub> NO <sup>+</sup> , 0.3), 251.17952 (C <sub>19</sub> H <sub>23</sub> <sup>+</sup> , 0.4), 126.12773 (C <sub>8</sub> H <sub>16</sub> N <sup>+</sup> , 0.04), 85.02840 (C <sub>4</sub> H <sub>5</sub> O <sub>2</sub> <sup>+</sup> , -0.02)                                                                                                                                                                                                                                             |

<sup>a</sup> Mass error in part per million (ppm) = 10<sup>6</sup> \* (accurate mass-exact mass)/exact mass. <sup>b</sup> Significant signals with signal-to-noise ratio 5 or higher were taken into consideration.

**Table S2.** Fruit morphological traits of Mirabella and Bianca di Senise eggplants.

| Traits and units            | Eggplant genotype |                           |
|-----------------------------|-------------------|---------------------------|
|                             | Mirabella         | Bianca di Senise          |
| Color                       | dark purple       | white with purple streaks |
| Length (cm)                 | 11.1 ± 0.5        | 15.1 ± 0.4                |
| Diameter at the middle (cm) | 6.6 ± 0.5         | 8.4 ± 0.2                 |
| Fresh weight (g.)           | 152.6 ± 18        | 452.8 ± 54                |
| Pulp dry matter (%)         | 11.5 ± 0.6        | 9.3 ± 0.3                 |
| Peel dry matter (%)         | 9.3 ± 0.1         | 7.0 ± 0.2                 |
